# Supplementary material
Source: PubMed Central journal article supplement (PMC6482932)
Supplement: JB.00740-18-s0003.pdf [file JB.00740-18-s0003.pdf]

A.

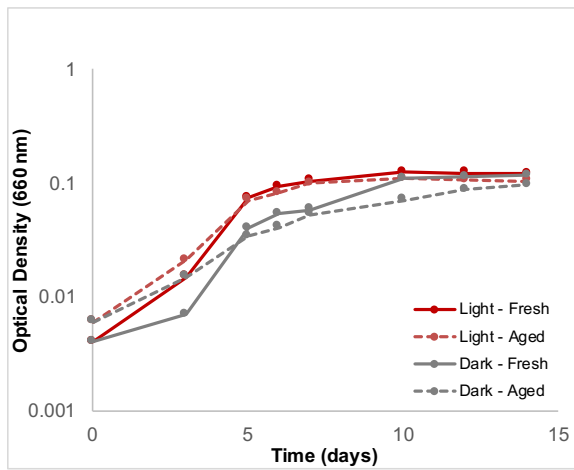

B.

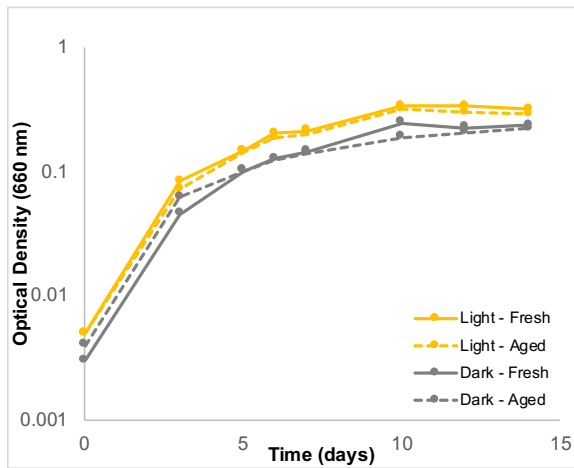

**Figure S1. Growth in light-aged media.** NSY medium was “aged” by exposure to white light for 4 days. Light-aged or fresh media were then inoculated with *Rhl. lacticola* (A) or *Aurantimicrobium* sp. strain Mo1 (B) and grown in white light or darkness as described in Materials and Methods. Although growth rates in fresh and aged media are not identical, the difference between growth in the light and growth in the dark is consistent.

**Figure S2.**

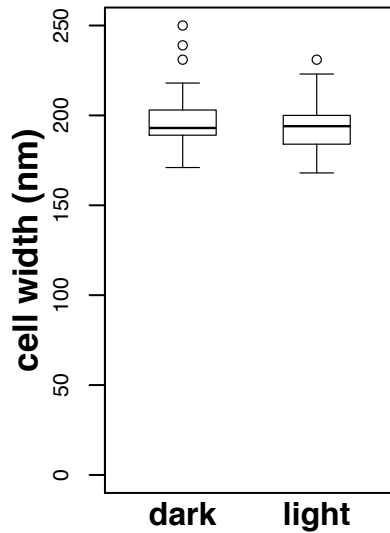

**Figure S2. Cell widths are the same in light and dark.** *Aurantimicrobium* sp. strain MWH-Mo1 was grown in white light or darkness, then imaged using SEM. NIH ImageJ was used to measure cell diameters in images; ~200 cells were measured. The average cell width (dark line) is the same in both conditions, and the distribution of measured values is also similar in both. Boxes include the 25th to 75th percentile of the data; whiskers represent  $1.5 \times$  the interquartile range. Dots indicate cells whose width was outside that range. This plot was generated using the R function `boxplot()` and the default parameters for that function.

**Figure S3.**

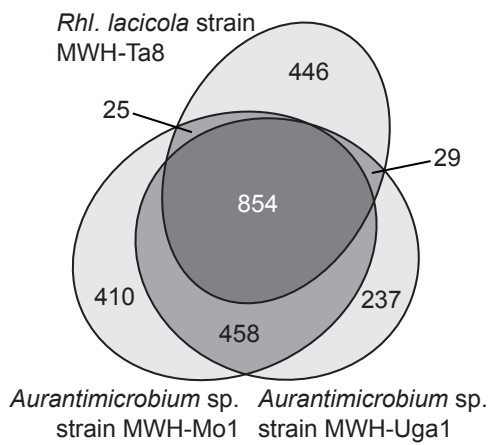

**Figure S3. Whole genome comparisons.** The predicted open reading frames in the genomes of *Rhl. lacticola*, *Aurantimicrobium* sp. strain MWH-Mo1, and *Aurantimicrobium* sp. strain MWH-Uga1 were compared using EFI-EST, and the overlaps were depicted using the program eulerAPE (<http://www.eulerdiagrams.org/eulerAPE/>). The two *Aurantimicrobium* spp. are very closely related (their 16S rRNA genes are 99.5% identical), and their genomes share a total of 1312 genes.

A.

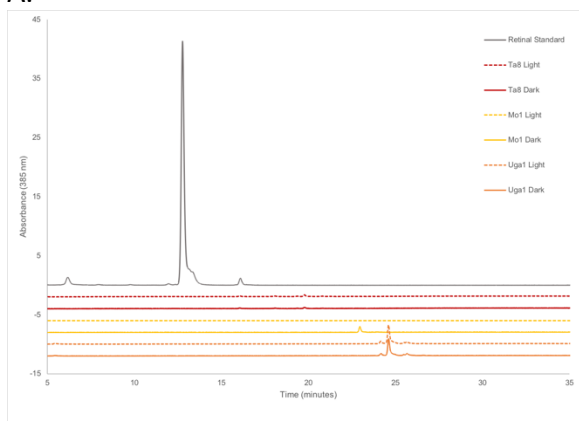

B.

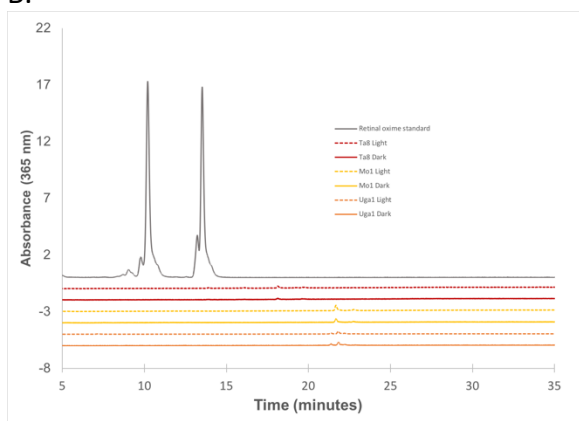

**Figure S4. Retinal is not produced by any of the Actinobacteria investigated here.** Cells (50 mL cultures) were grown in white light or darkness as described in Materials and Methods and pigments extracted for HPLC analysis. No peak corresponding to either free retinal or retinal oxime is observed in any sample. **A. Methanol extracts of cells.** The gray line is a commercial retinal standard with a single peak corresponding to free retinal (indicated by “R” in both A and B); no peak with the same retention time is observed in any of the pigment extracts from cells. **B. Retinal oxime derivatives.** When released from a rhodopsin, retinal is present not as free retinal, but as retinal oxime. The retinal oxime standard (indicated by “RO”) was produced by reacting the commercial retinal standard with hydroxylamine. To release any retinal from rhodopsins in cells, cells were lysed by sonication in methanol, then hydroxylamine was added to the lysate and incubated on ice for 1.5 hours. Cellular debris was then removed by centrifugation and filtration prior to loading on the HPLC. Fresh solvents were prepared between the samples shown in A and those in B, which changed the retention times by ~1.5 min.

**Figure S5.**

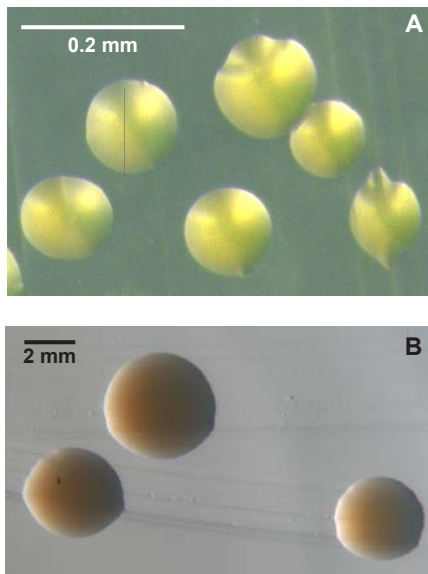

**Figure S5. Colony pigmentation.** (A) Colonies of *Aurantimicrobium* sp. strain MWH-Mo1 are bright yellow, and (B) those of *Aurantimicrobium* sp. strain MWH-Uga1 are orange, due to biosynthesis of carotenoids.

Figure S6.

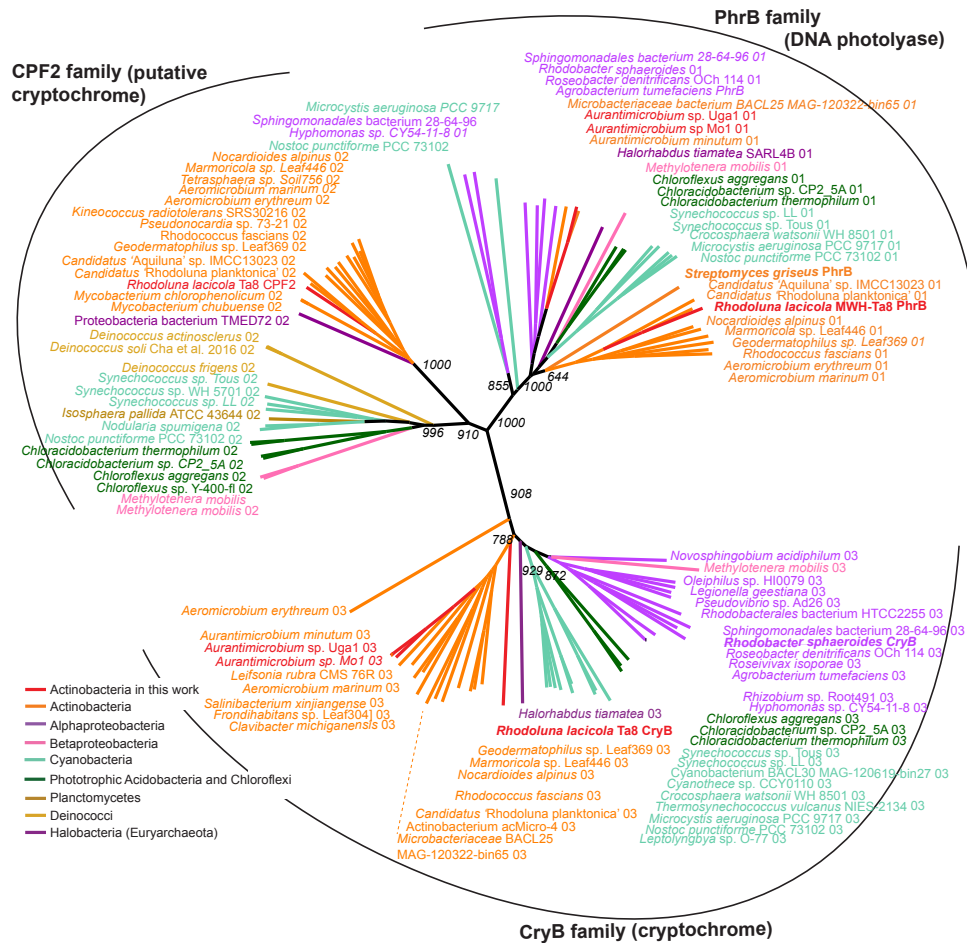

**Figure S6. Phylogeny of cryptochrome-photolyase family (CPF) proteins found in Actinobacteria.** Homologs of the three CPF proteins found in the *Rhl. ladicola* genome were aligned with ClustalW and a neighbor-joining tree was calculated with 1000 bootstraps, then visualized with Iroki. The three proteins clearly group separately, with the CryB-type cryptochromes separate from both DNA photolyases (PhrB) and the other putative cryptochrome (here labeled “CPF2”). Homologs of CryB are broadly distributed among Actinobacteria, phototrophic Acidobacteria, Archaea (primarily the halophilic Archaea), Cyanobacteria, and Proteobacteria (both phototrophic and not). CPF2 is separated into two clear groups, one of which includes Actinobacteria and a few Proteobacteria, and another that is found predominantly in Cyanobacteria and other phototrophs. The numbers after species names indicate whether the protein was found in the NCBI non-redundant database using the *Rhl. ladicola* photolyase (01), “CPF2” (02), or CryB homolog (03) amino acid sequence as the BLAST query. Accession numbers for the proteins used in this tree can be found in Table S4.

**Figure S7.**

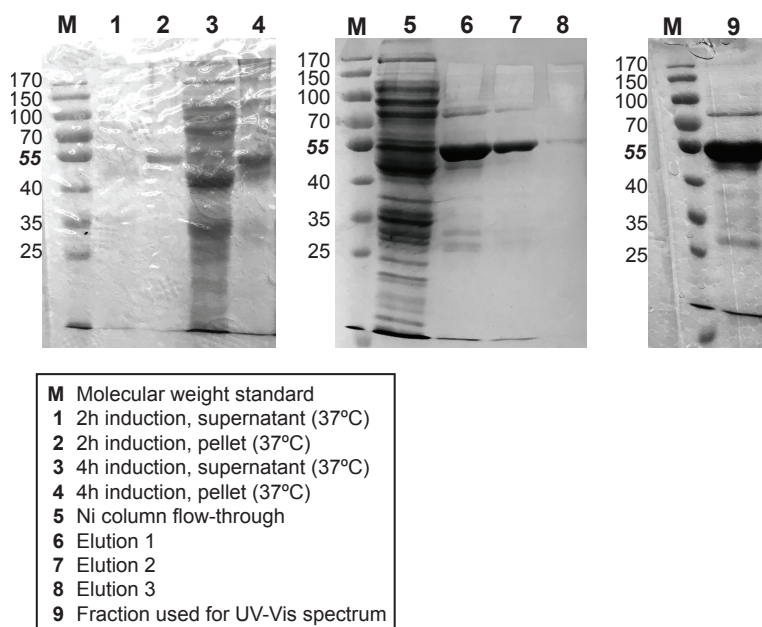

**Figure S7. SDS-PAGE of overexpressed RS06470.** Representative gels showing expression of RS06470. All lanes labeled “M” have the PageRuler Protein Ladder (10-180 KDa, ThermoScientific 26616). Lanes 1-4: Overexpression of RS06470 in *E. coli* at 37°C. Most protein produced at this temperature is insoluble, so growth temperature was reduced to ~23°C to decrease overexpression and increase soluble protein content. Lanes 5-8: After growth and induction at 23°C, the RS06470 protein was purified over a Ni column. RS06470 is predicted to have a molecular mass of 56 KDa. Most of the expressed protein elutes in the first two elution fractions. Lane 9: Fraction containing RS06470 used for UV-Vis spectroscopy.

**Table S2. Sequences of known light-sensitive protein used as queries in genome searches.** All three genomes (*Rhl. lacicola*, *Aurantimicrobium* sp. strain MWH-Mo1, and *Aurantimicrobium* sp. strain MWH-Uga1) were searched for predicted homologs of these proteins. Only the cryptochrome CryB from *Rhb. sphaeroides* and the DNA photolyase PhrB from *Streptomyces griseus* (in bold in the table above) had full-length alignments to predicted proteins in the genomes of *Rhl. lacicola* strain MWH-Ta8 and *Aurantimicrobium* sp. strains MWH-Mo1 and MWH-Uga1. Homologs of actinorhodopsin were identified in the genomes of *Rhl. lacicola* and *Aurantimicrobium* sp. strain MWH-Uga1, and homologs of heliorhodopsin were identified in both *Aurantimicrobium* species. None of the genomes encoded a homolog of the enzyme required for retinal synthesis from beta carotene.

| Gene Name     | Accession Number | Species                                | Function                                      | Cofactor | Other domains                          | Locus tags of best hits in genomes |
|---------------|------------------|----------------------------------------|-----------------------------------------------|----------|----------------------------------------|------------------------------------|
| AerR          | BAL96683.1       | <i>Rubrivivax gelatinosus</i> IL144    | blue light sensing                            | B12      |                                        |                                    |
| CarH          | CAA79965.2       | <i>Myxococcus xanthus</i>              | blue light regulation of carotenoid synthesis | B12      |                                        |                                    |
| LitR          | BAC68924.1       | <i>Streptomyces avermitilis</i>        | light sensing                                 | B12      |                                        |                                    |
| MerR-B12 type | KRO35156         | uncharacterized marine Actinobacterium | putative light sensitive regulator            | B12      | MerR domain                            |                                    |
| MerR-B12 type | WP_067360985     | <i>Micromonospora rosaria</i>          | putative light sensitive regulator            | B12      | MerR domain                            |                                    |
| PpaA          | YP_353357.1      | <i>Rhodobacter sphaeroides</i>         | blue light sensing                            | B12      |                                        |                                    |
| CcaS          | BAK51774.1       | <i>Synechocystis</i> sp. PCC 6803      | Green light sensing                           | bilin    |                                        |                                    |
| Cph1          | WP_010873534.1   | <i>Synechocystis</i> sp. PCC 6803      | phytochrome, red light reponse                | bilin    | GAF domain                             |                                    |
| Cph2          | WP_351608.1      | <i>Synechocystis</i> sp. PCC 6803      | phytochrome, red light reponse                | bilin    |                                        |                                    |
| Rcp1          | Q55169.1         | <i>Synechocystis</i> sp. PCC 6803      | phytochrome, red light reponse                | bilin    |                                        |                                    |
| BhpP (1)      | YP_345384.1      | <i>Rhodobacter sphaeroides</i>         | phytochrome                                   | bilin    | EAL, GGDEF signal transduction domains |                                    |
| BhpP (2)      | YP_345327.1      | <i>Rhodobacter sphaeroides</i>         | phytochrome                                   | bilin    | PAS, GAF, phytochrome, EAL, GGDEF      |                                    |



|             |                       |                                            |                                                     |                   |                      |                                                          |
|-------------|-----------------------|--------------------------------------------|-----------------------------------------------------|-------------------|----------------------|----------------------------------------------------------|
| AppA        | YP_351608.1           | <i>Rhodobacter sphaeroides</i>             | Antirepressor of PpsR, regulation of light-response | FAD               |                      |                                                          |
| BlrP1       | AGT24399.1            | <i>Klebsiella pneumoniae</i>               | blue light sensing                                  | FAD               |                      |                                                          |
| BlsA        | ABO12652.2            | <i>Acinetobacter baumannii</i>             | blue light sensing                                  | FAD               |                      |                                                          |
| Glr1749     | BAC89690.1            | <i>Gloeobacter violaceus</i>               | DNA photorepair                                     | FAD               |                      |                                                          |
| LovK        | AAK22272.2            | <i>Caulobacter crescentus</i>              | blue light sensing                                  | FAD               |                      |                                                          |
| PapB        | CAE25966.1            | <i>Rhodospseudomonas palustris</i>         | light sensor; BLUF                                  | FAD               |                      |                                                          |
| <b>PhrB</b> | <b>WP_051804377.1</b> | <b><i>Streptomyces griseus</i></b>         | <b>DNA photorepair</b>                              | <b>FAD</b>        |                      | <b>RHOLA_RS03920,<br/>AURMO_01673,<br/>AURUGA1_01549</b> |
| YcgF        | YP_002407889.1        | <i>Escherichia coli</i>                    | blue light sensing                                  | FAD               |                      |                                                          |
| <b>CryB</b> | <b>WP_011339023.1</b> | <b><i>Rhodobacter sphaeroides</i></b>      | <b>Blue light sensing</b>                           | <b>FAD, DLZ</b>   |                      | <b>RHOLA_RS06470,<br/>AURMO_00962,<br/>AURUGA1_00706</b> |
| Cry1        | SNC55619.1            | <i>Vibrio cholerae</i>                     | cryptochrome-DASH family                            | FAD, folate       | CRY-DASH             |                                                          |
| LovK        | AAK22272.2            | <i>Caulobacter crescentus</i>              | blue light sensing                                  | FMN               | LOV                  |                                                          |
| SL1         | ABB56220.1            | <i>Synechococcus elongatus</i> sp. PCC7942 | blue light sensing                                  | FMN               | LOV                  |                                                          |
| SL2         | ABB57385.1            | <i>Synechococcus elongatus</i> sp. PCC7942 | blue light sensing                                  | FMN               | LOV                  |                                                          |
| YtvA        | AQR87275.1            | <i>Bacillus subtilis</i>                   | Phototropin                                         | FMN               | LOV                  |                                                          |
| PpsR        | AAF24278.1            | <i>Rhodobacter sphaeroides</i>             | blue light sensing                                  | Heme              |                      |                                                          |
| PYP         | ATZ73421.1            | <i>Idiomarina</i>                          | Light sensing                                       | p-coumaric acid   |                      |                                                          |
| Cry2        | SNC55940.1            | <i>Vibrio cholerae</i>                     | cryptochrome-like                                   | photolyase domain |                      |                                                          |
| LMIV_0353   | EHY62896.1            | <i>Listeria monocytogenes</i>              | DNA photorepair                                     | photolyase domain | Class I photolyase   |                                                          |
| UM89_12670  | KJJ41516.1            | <i>Bacillus subtilis</i>                   | DNA photorepair                                     | photolyase domain | Class III photolyase |                                                          |
| RcaE-like   | U67397.1              | <i>Synechocystis</i> sp. PCC 6803          | blue light sensing                                  | Phytochrome       | PAS, GAF             |                                                          |

|             |                   |                                           |                                                     |                   |                      |                                     |
|-------------|-------------------|-------------------------------------------|-----------------------------------------------------|-------------------|----------------------|-------------------------------------|
| CarF        | AAO22861.1        | <i>Myxococcus xanthus</i>                 | blue light regulation of carotenoid synthesis       | Protoporphyrin IX |                      |                                     |
| Mmc1_0735   | ABK43256.1        | <i>Magnetococcus</i> sp. strain Mmc1      | putative blue light sensor                          |                   | GAF/PAS              |                                     |
| PYP         | ADV90265.1        | <i>Thermochromatium</i>                   | PYP/phytochrome/cGMP                                |                   | PAS, GAF, EAL, GGDEF |                                     |
| <b>ActR</b> | <b>FJ545221.1</b> | <b><i>Rhodoluna lacicola</i></b>          | <b>Actinorhodopsin</b>                              | <b>Retinal</b>    |                      | <b>RHOLA_RS06005, AURUGA1_00474</b> |
| <b>HeR</b>  | <b>MF737519.1</b> | <b>Uncultured Actinobacterium</b>         | <b>Heliorhodopsin</b>                               | <b>Retinal</b>    |                      | <b>AURMO_01564, AURUGA1_00456</b>   |
| Blh/Brp     | WP_070955078      | <i>Rhodoluna planktonica</i> sp. MWH-Dar1 | Putative beta carotene 15, 15' cleavage dioxygenase |                   |                      |                                     |

**Supplementary Table S3.** Protein domains searched for in actinobacterial genomes. Although proteins with homology to some of these domains were identified, none but the DNA photolyase or the CryB-related proteins appeared to be potential light sensors. Most had strong evidence for the annotations provided, such as RS04025, which has a B12 binding domain (PF02310) and is likely to be the methionine synthase in *Rhl. laticola*. However, some genes shared by all three genomes have intriguing combinations of PAS domains and signal transduction domains, and may be involved in signaling and/or gene regulation after light sensing.

| Domain name   | PFAM    | Cofactor        |
|---------------|---------|-----------------|
| BLUF          | PF04940 | FAD             |
| CodY          | PF06018 |                 |
| EAL           | PF00563 |                 |
| GAF           | PF01590 |                 |
| GAF2          | PF13185 |                 |
| GAF3          | PF13492 |                 |
| GGDEF         | PF00990 |                 |
| HAMP          | PF00672 |                 |
| PAS           | PF00989 |                 |
| PAS 11        | PF14598 |                 |
| PAS 2         | PF08446 |                 |
| PAS 3         | PF08447 |                 |
| PAS 4         | PF08448 |                 |
| PAS 5         | PF07310 |                 |
| PAS 6         | PF08348 |                 |
| PAS 7         | PF12860 |                 |
| PAS 8         | PF13188 |                 |
| PAS 9         | PF13426 |                 |
| PHY           | PF00360 | bilin           |
| B12 binding   | PF02310 | B12             |
| B12 binding 2 | PF02607 | B12             |
| MEKHLA domain | PF08670 | p-coumaric acid |
| PYP           | PF13188 | p-coumaric acid |
| OCP           | PF09150 | carotenoid      |
| Bac_rhodopsin | PF01036 | retinal         |
| photolyase    | PF00875 | flavin          |
| photolyase    | PF04244 | flavin          |
| FAD_binding_7 | PF03441 | FAD             |
| cryptochrome  | PF12546 | flavin          |
| DPRP          | PF04244 | flavin          |

**Table S4. Accession numbers of amino acid sequences used in Figs. 5 and S6.** Species names specified in Fig. S6 and the associated NCBI accession numbers. The numbers after the species names indicate the CPF clade to which that protein belongs: 01, PhrB-type DNA photolyase; 02, CryB-type cryptochrome; 03, “CPF2” family protein (uncharacterized).

| Species Name                                                   | NCBI Accession Number |
|----------------------------------------------------------------|-----------------------|
| <i>Rhodoluna ladicola</i> MWH-Ta8 PhrB                         | 2504662661            |
| <i>Aurantimicrobium</i> sp strain MWH-Mo1 01                   | Mo1_00164             |
| <i>Candidatus</i> 'Aquiluna' sp. IMCC13023 01                  | WP_007541646.1        |
| <i>Rhodobacter sphaeroides</i> 01                              | WP_023003558.1        |
| <i>Agrobacterium tumefaciens</i> PhrB                          | WP_080866077.1        |
| <i>Aurantimicrobium minutum</i> 01                             | WP_096383072.1        |
| <i>Aeromicrobium marinum</i> 01                                | WP_040320017.1        |
| <i>Candidatus</i> 'Rhodoluna planktonica' 01                   | WP_070954614.1        |
| <i>Nocardioides alpinus</i> 01                                 | WP_091200075.1        |
| <i>Microbacteriaceae</i> bacterium BAACL25 MAG-120322-bin65 01 | KRO39476.1            |
| <i>Crocospaera watsonii</i> WH 8501 01                         | WP_007304147.1        |
| <i>Microcystis aeruginosa</i> PCC 9717 01                      | WP_002758099.1        |
| <i>Synechococcus</i> sp. LL 01                                 | WP_094591764.1        |
| <i>Nostoc punctiforme</i> PCC 73102 01                         | WP_012408666.1        |
| <i>Sphingomonadales</i> bacterium 28-64-96 01                  | OYZ13787.1            |
| <i>Roseobacter denitrificans</i> OCh 114 01                    | WP_011568493.1        |
| <i>Hyphomonas</i> sp. CY54-11-8 01                             | WP_034769403.1        |
| <i>Geodermatophilus</i> sp. Leaf369 01                         | KQS60369.1            |
| <i>Marmoricola</i> sp. Leaf446 01                              | WP_056540310.1        |
| <i>Rhodococcus fascians</i> 01                                 | WP_037185002.1        |
| <i>Aeromicrobium erythreum</i> 01                              | WP_067859230.1        |
| <i>Synechococcus</i> sp. Tous 01                               | OON12124.1            |
| <i>Chloroflexus aggregans</i> 01                               | WP_012616155.1        |
| <i>Chloracidobacterium thermophilum</i> 01                     | WP_058868137.1        |
| <i>Chloracidobacterium</i> sp. CP2_5A 01                       | OYT73889.1            |
| <i>Methylothera mobilis</i> 01                                 | WP_015832830.1        |
| <i>Halorhabdus tiamatea</i> SARL4B 01                          | WP_008525328.1        |
| <i>Rhodoluna ladicola</i> MWH-Ta8 CPF2                         | 2504662972            |
| <i>Candidatus</i> 'Aquiluna' sp. IMCC13023 02                  | EIC91855.1            |
| <i>Aeromicrobium marinum</i> 02                                | WP_007077203.1        |
| <i>Rhodoluna planktonica</i> 02                                | WP_070955074.1        |
| <i>Nocardioides alpinus</i> 02                                 | WP_091199138.1        |
| <i>Synechococcus</i> sp. LL 02                                 | WP_094589955.1        |
| <i>Nostoc punctiforme</i> PCC 73102 02                         | WP_012412678.1        |
| <i>Geodermatophilus</i> sp. Leaf369 02                         | KQS60737.1            |
| <i>Marmoricola</i> sp. Leaf446 02                              | WP_056539249.1        |
| <i>Rhodococcus fascians</i> 02                                 | WP_037152333.1        |
| <i>Mycobacterium chubuense</i> 02                              | WP_048420367.1        |
| <i>Pseudonocardia</i> sp. 73-21 02                             | OJY39528.1            |
| <i>Mycobacterium chlorophenolicum</i> 02                       | WP_048472468.1        |
| <i>Tetrasphaera</i> sp. Soil756 02                             | KRE61391.1            |

|                                                               |                |
|---------------------------------------------------------------|----------------|
| <i>Kineococcus radiotolerans</i> SRS30216, ATCC BAA-149 02    | WP_012086202.1 |
| <i>Aeromicrobium erythreum</i> 02                             | WP_067861656.1 |
| <i>Proteobacteria</i> bacterium TMED72 02                     | OOU91956.1     |
| <i>Synechococcus</i> sp. Tous 02                              | OON13070.1     |
| <i>Synechococcus</i> sp. WH 5701 02                           | WP_006173128.1 |
| <i>Chloroflexus aggregans</i> 02                              | WP_015940350.1 |
| <i>Deinococcus frigens</i> 02                                 | WP_051668791.1 |
| <i>Chloroflexus</i> sp. Y-400-fl 02                           | WP_015909133.1 |
| <i>Deinococcus soli</i> Cha et al. 2016 02                    | WP_081424584.1 |
| <i>Nodularia spumigena</i> 02                                 | WP_063873664.1 |
| <i>Deinococcus actinosclerus</i> 02                           | WP_062157339.1 |
| <i>Chloracidobacterium thermophilum</i> 02                    | WP_058867563.1 |
| <i>Chloracidobacterium</i> sp. CP2_5A 02                      | OYT71351.1     |
| <i>Isosphaera pallida</i> ATCC 43644 02                       | WP_013564012.1 |
| <i>Methylothermobacter mobilis</i> 02                         | WP_019899883.1 |
| <i>Rhodoluna laticola</i> MWH-Ta8 CryB                        | 2504663175     |
| <i>Aurantimicrobium</i> sp strain Mo1 03                      | Mo1_01237      |
| <i>Rhodobacter sphaeroides</i> CryB                           | WP_011339023.1 |
| <i>Agrobacterium tumefaciens</i> 03                           | WP_010974139.1 |
| <i>Aurantimicrobium minutum</i> 03                            | BAU99214.1     |
| <i>Leifsonia rubra</i> CMS 76R 03                             | EPR76568.1     |
| <i>Frondehabitans</i> sp. Leaf304] 03                         | WP_055961530.1 |
| <i>Salinibacterium xinjiangense</i> 03                        | WP_097060556.1 |
| <i>Clavibacter michiganensis</i> 03                           | WP_086520529.1 |
| <i>Aeromicrobium marinum</i> 03                               | WP_007077117.1 |
| <i>Actinobacterium acMicro-4</i> 03                           | KGA05005.1     |
| <i>Rhodoluna planktonica</i> 03                               | WP_070954309.1 |
| <i>Nocardioides alpinus</i> 03                                | WP_091193811.1 |
| <i>Microbacteriaceae</i> bacterium BACL25 MAG-120322-bin65 03 | KRO39092.1     |
| <i>Crocospaera watsonii</i> WH 8501 03                        | WP_007303106.1 |
| <i>Leptolyngbya</i> sp. O-77 03                               | WP_068513283.1 |
| <i>Microcystis aeruginosa</i> PCC 9717 03                     | WP_002757006.1 |
| <i>Cyanothece</i> sp. CCY0110 03                              | WP_035798102.1 |
| <i>Cyanobacterium</i> BACL30 MAG-120619-bin27 03              | KRO92874.1     |
| <i>Synechococcus</i> sp. LL 03                                | WP_094591397.1 |
| <i>Thermosynechococcus vulcanus</i> NIES-2134 03              | BAY52557.1     |
| <i>Nostoc punctiforme</i> PCC 73102 03                        | ACC82051.1     |
| <i>Novosphingobium acidiphilum</i> 03                         | WP_028639404.1 |
| <i>Sphingomonadales</i> bacterium 28-64-96 03                 | OYZ14664.1     |
| <i>Oleiphilus</i> sp. HI0079 03                               | WP_082873371.1 |
| <i>Rhodobacterales</i> bacterium HTCC2255 03                  | WP_008033738.1 |
| <i>Roseobacter denitrificans</i> OCh 114 03                   | WP_044032967.1 |
| <i>Rhizobium</i> sp. Root491 03                               | KQY40850.1     |
| <i>Pseudovibrio</i> sp. Ad26 03                               | WP_063312709.1 |
| <i>Hyphomonas</i> sp. CY54-11-8 03                            | WP_034766300.1 |
| <i>Legionella geestiana</i> 03                                | WP_028386762.1 |
| <i>Roseivivax isopora</i> 03                                  | WP_043767667.1 |

|                                            |                |
|--------------------------------------------|----------------|
| <i>Geodermatophilus</i> sp. Leaf369 03     | KQS61106.1     |
| <i>Marmoricola</i> sp. Leaf446 03          | WP_056540174.1 |
| <i>Rhodococcus fascians</i> 03             | WP_037141299.1 |
| <i>Aeromicrobium erythreum</i> 03          | ALX06096.1     |
| <i>Synechococcus</i> sp. Tous 03           | OON11793.1     |
| <i>Chloroflexus aggregans</i> 03           | WP_015942013.1 |
| <i>Chloracidobacterium thermophilum</i> 03 | WP_014099386.1 |
| <i>Chloracidobacterium</i> sp. CP2_5A 03   | OYT72432.1     |
| <i>Methylotenera mobilis</i> 03            | WP_036317054.1 |
| <i>Halorhabdus tiamatea</i> SARL4B 03      | CCQ32593.1     |
| <i>Aurantimicrobium minutum</i> 04         | WP_096381351.1 |
| <i>Microcystis aeruginosa</i> PCC 9717     | WP_002756763.1 |
| <i>Nostoc punctiforme</i> PCC 73102        | WP_012413103.1 |
| <i>Sphingomonadales</i> bacterium 28-64-96 | OYZ13813.1     |
| <i>Methylotenera mobilis</i>               | WP_012777621.1 |
